# Supplementary material for: Investigating the Mechanisms Underlying the Low Irradiance-Tolerance of the Economically Important Seaweed Species Pyropia haitanensis
Source: MDPI journal article supplement (doi:10.3390/life13020481), 2023-02-09
Supplement: s1 [file s1]

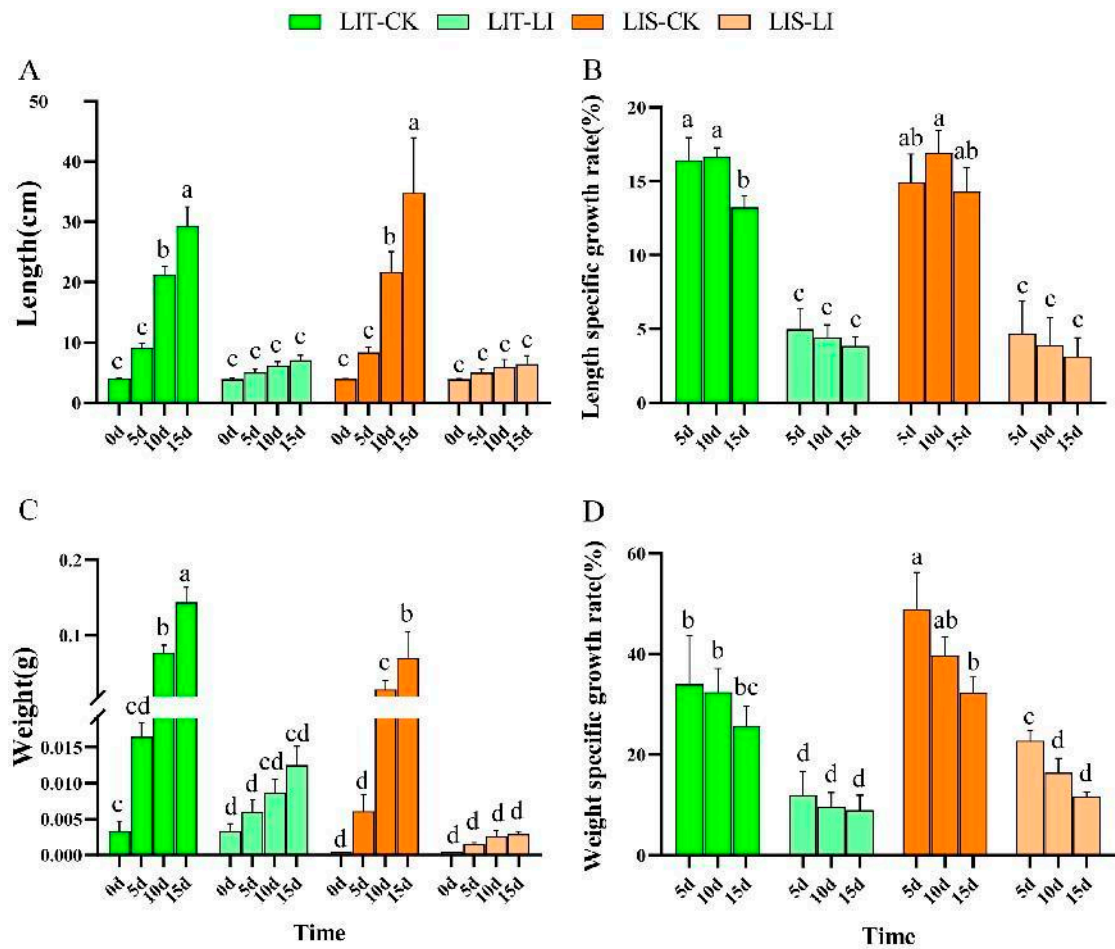

**Figure S1** The growth characteristics of thalli of different *Pyropia haitanensis* strains under low irradiance (LI) conditions. A - D represent the length changes, the growth rate of length, the weight changes, and the increase rate of weight of the thalli, respectively; LIT, LI-tolerance strain; LIS, LI-sensitive strain; CK, control. Different letters represent significant differences among the thalli of same strain under LI conditions ( $P < 0.05$ )

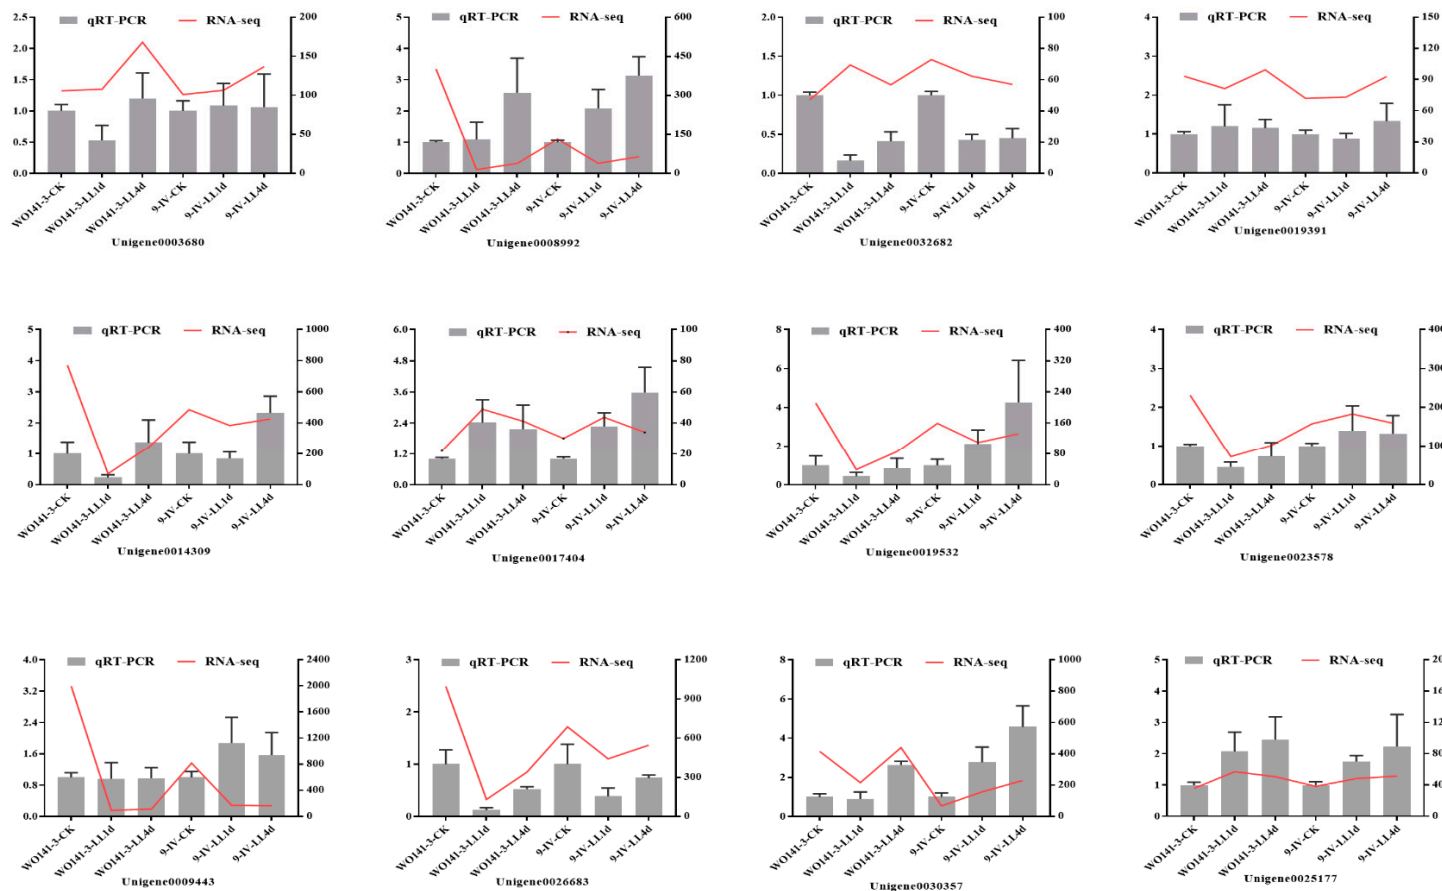

**Supplementary Figure S2** qPCR validation of RNA sequencing data on 12 selected genes under low irradiance 5  $\mu\text{mol}/(\text{m}^2 \cdot \text{s})$  treatment

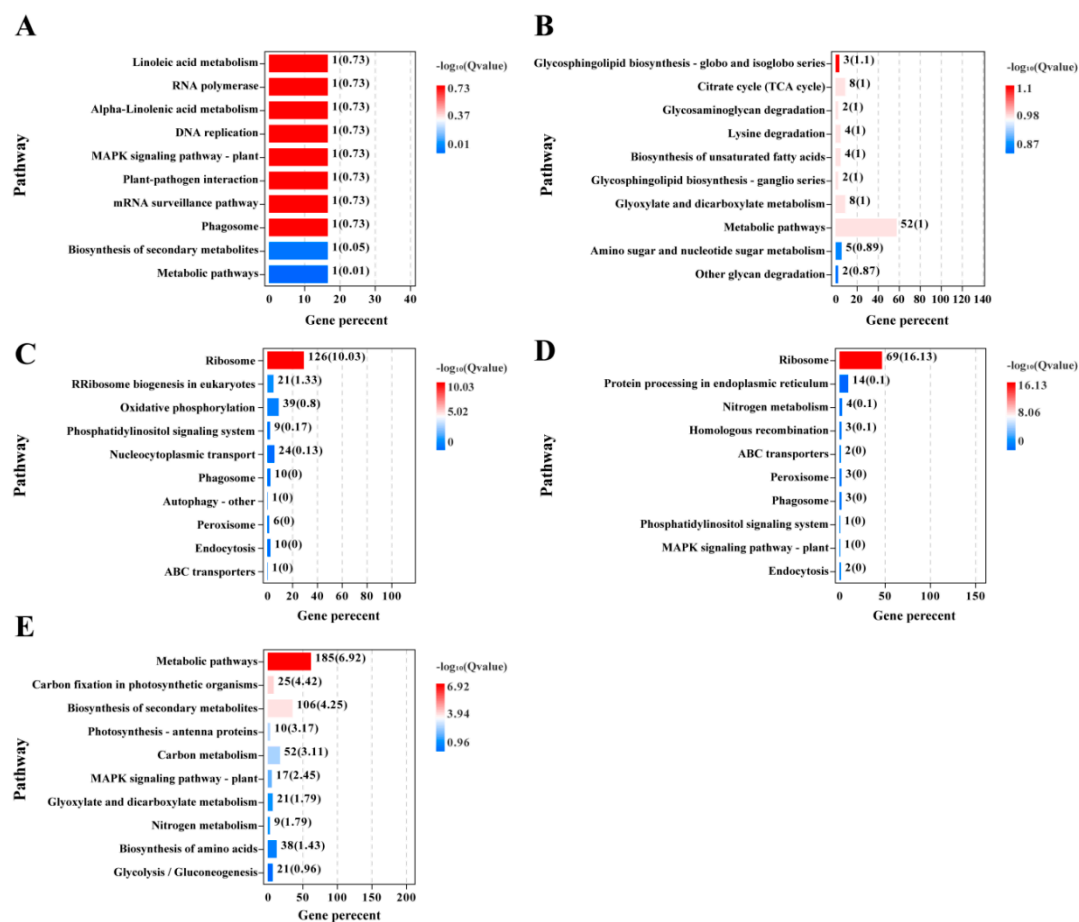

**Figure S3** KEGG pathway enrichment analysis of the different expressed genes that co-expressed and specifically expressed in two *Pyropia haitanensis* strains under different light irradiance stresses. A and B, KEGG pathway enrichment analysis of specifically expressed genes in the low irradiance-tolerant (LIT) strain treated with low irradiance for 1 and 4 days, respectively; C and D, KEGG pathway enrichment analysis of specifically expressed genes in the low irradiance-sensitive (LIS) strain treated with low irradiance for 1 and 4 days, respectively. E, KEGG pathway enrichment analysis of co-expressed genes in both strains under different light irradiance stresses.
