# Supplementary material for: Investigating the Mechanisms Underlying the Low Irradiance-Tolerance of the Economically Important Seaweed Species Pyropia haitanensis
Source: MDPI journal article supplement (doi:10.3390/life13020481), 2023-02-09
Supplement: s1 [file s1]

Table S1 The names and sequences of primers used in the RT-PCR experiment

| Gene ID        | Primer sequences                                   |
|----------------|----------------------------------------------------|
| Unigene0003680 | F: GGTGGCGATGGGTGACAACG<br>R: TCGGATCCTTGAGGCCGAGT |
| Unigene0008992 | F: GCGTCATGACTCGGCGTACT<br>R: GGCGAGAAGTCGTCGATCCG |
| Unigene0009443 | F: TCGGAGGAAGCCAAGGTCCA<br>R: CGCCATGGGCACGTTGTACT |
| Unigene0032682 | F: CTCTCTTCCTCCCAGCCAAC<br>R: CGTACGTGAGCATCTTGACC |
| Unigene0019391 | F: GTACGGCATTCCAGTGTCGG<br>R: CTGATGCGGTCTGCTCCTTG |
| Unigene0014309 | F: GCAGCCGATCATGGAGTCGT<br>R: CACCGAGTGCTTGGCCTTGT |
| Unigene0017404 | F: GCCGGTGTACGTGCTCATCA<br>R: AGCGAGCACGTGTTGACGAT |
| Unigene0019532 | F: GGCCGTTTGGGACCGAGAG<br>R: AAGGCAAACACCTGGCCACA  |
| Unigene0023587 | F: GCAGGGACCATTGGCAACCT                            |

|                |                          |
|----------------|--------------------------|
|                | R: CCACCGACGTATGGGTGAGC  |
|                | <hr/>                    |
|                | F: GGCAGAACAAGACGGGTGAG  |
| Unigene0025177 |                          |
|                | R: GGAAGAGCGACATGACCGAC  |
|                |                          |
|                | F: GACGATTGCGTCGGACCTGT  |
| Unigene0026683 |                          |
|                | R: CCGTATCGTACGCCGTCTCG  |
|                |                          |
|                | F: CCAAGCCGCTGGTAGAGTTC  |
| Unigene0030357 |                          |
|                | R: TAGTTGACGGCCAGAACCAC  |
|                |                          |
|                | F: TCACAACGAGGATTTACCACC |
| UBC            |                          |
|                | R: GAGGAGCACCTTGGAAAGG   |
|                | <hr/>                    |
