# Supplementary material for: Investigating the Mechanisms Underlying the Low Irradiance-Tolerance of the Economically Important Seaweed Species Pyropia haitanensis
Source: Life (Basel). 2023 Feb 9;13(2):481. doi: 10.3390/life13020481 (PMC9965670; doi:10.3390/life13020481)
Supplement: Supplementary file 1 [file life-13-00481-s001.zip › Supplementary Table S2.xlsx]

## Sheet: Circadian rhythm - plant
Differentially expressed genes	K_id desc
CRY1	cryptochrome 1
COP1	E3 ubiquitin-protein ligase RFWD2

## Sheet: Photosynthesis
Differentially expressed genes	K_id desc
ATP5PO	F-type H+-transporting ATPase subunit delta
atpA	F-type H+/Na+-transporting ATPase subunit beta
atpB	F-type H+/Na+-transporting ATPase subunit alpha
ATPC	F-type H+-transporting ATPase subunit gamma
atpH	F-type H+-transporting ATPase subunit delta
DRT112	plastocyanin
FD3	ferredoxin
petB	cytochrome b6
petC	cytochrome b6-f complex iron-sulfur subunit
petF	ferredoxin
PETH	ferredoxin--NADP+ reductase
psaD	photosystem I subunit II
PSAL	photosystem I subunit XI
psb27	photosystem II Psb27 protein
psbA	photosystem II P680 reaction center D1 protein
psbB	photosystem II CP47 chlorophyll apoprotein
psbC	photosystem II CP43 chlorophyll apoprotein
psbE	photosystem II cytochrome b559 subunit alpha
psbM	photosystem II PsbM protein
psbO	photosystem II oxygen-evolving enhancer protein 1
PSBO1	photosystem II oxygen-evolving enhancer protein 1
PSBP1	photosystem II oxygen-evolving enhancer protein 2
PSBR	photosystem II 10kDa protein
psbU	photosystem II PsbU protein
psbV	photosystem II cytochrome c550

## Sheet: Photosynthesis - antenna protei
Differentially expressed genes	K_id desc
apcB	allophycocyanin beta subunit
apcC	phycobilisome core linker protein
cpcB	phycocyanin beta chain
cpcC	phycocyanin-associated rod linker protein
cpcE	phycocyanobilin lyase subunit alpha
cpcF	phycocyanobilin lyase subunit beta
cpeB	phycocyanin beta chain
LHCA1	light-harvesting complex I chlorophyll a/b binding protein 1
LHCA2	light-harvesting complex I chlorophyll a/b binding protein 2
LHCA3	light-harvesting complex I chlorophyll a/b binding protein 3
LHCB1	light-harvesting complex II chlorophyll a/b binding protein 1
LHCB4	light-harvesting complex II chlorophyll a/b binding protein 4

## Sheet: Porphyrin and chlorophyll metab
Differentially expressed genes	K_id desc
ALAS	5-aminolevulinate synthase
bchM	magnesium-protoporphyrin O-methyltransferase
chlB	light-independent protochlorophyllide reductase subunit B
chlD	magnesium chelatase subunit D
chlH	magnesium chelatase subunit H
chlI	magnesium chelatase subunit I
cobT	nicotinate-nucleotide--dimethylbenzimidazole phosphoribosyltransferase
COX10	heme o synthase
CPOX	coproporphyrinogen III oxidase
hemA	glutamyl-tRNA reductase
hemC	hydroxymethylbilane synthase
hemE	uroporphyrinogen decarboxylase
hemH	protoporphyrin/coproporphyrin ferrochelatase
hemL	glutamate-1-semialdehyde 2,1-aminomutase
HEPH	hephaestin
HO	heme oxygenase (biliverdin-producing, ferredoxin)
HY2	phytochromobilin:ferredoxin oxidoreductase
PAO	pheophorbide a oxygenase
por	protochlorophyllide reductase
PPOX1	protoporphyrinogen/coproporphyrinogen III oxidase

## Sheet: Carbon fixation in photosynthet
Differentially expressed genes	K_id desc
ALDO	fructose-bisphosphate aldolase, class I
Aldoa	fructose-bisphosphate aldolase, class I
At3g55800	sedoheptulose-bisphosphatase
CSBP	sedoheptulose-bisphosphatase
FBA	fructose-bisphosphate aldolase, class II
FBA6	fructose-bisphosphate aldolase, class I
FBP	fructose-1,6-bisphosphatase I
GAPA	glyceraldehyde-3-phosphate dehydrogenase (NADP+) (phosphorylating)
GAPA1	glyceraldehyde-3-phosphate dehydrogenase (NADP+) (phosphorylating)
GAPDH	glyceraldehyde 3-phosphate dehydrogenase
Gapdh	glyceraldehyde 3-phosphate dehydrogenase
Gapdh	glyceraldehyde 3-phosphate dehydrogenase
GOT1	aspartate aminotransferase, cytoplasmic
GOT2	aspartate aminotransferase, mitochondrial
maeB	malate dehydrogenase (oxaloacetate-decarboxylating)(NADP+)
mdh	malate dehydrogenase
MDH1	malate dehydrogenase
Mdh1	malate dehydrogenase
MDH2	malate dehydrogenase
GOT1	aspartate aminotransferase, cytoplasmic
pckA	phosphoenolpyruvate carboxykinase (ATP)
pckA2	phosphoenolpyruvate carboxykinase (ATP)
PGK	phosphoglycerate kinase
ppc	phosphoenolpyruvate carboxylase
PRK	phosphoribulokinase
rbcL	ribulose-bisphosphate carboxylase large chain
RBCS	ribulose-bisphosphate carboxylase small chain
RBCS-1A	ribulose-bisphosphate carboxylase small chain
RPE	ribulose-phosphate 3-epimerase
rpiA	ribose 5-phosphate isomerase A
TKT	transketolase
tktA	transketolase
TPI	triosephosphate isomerase (TIM)

## Sheet: Citrate cycle (TCA cycle)
Differentially expressed genes	K_id desc
OGDH	2-oxoglutarate dehydrogenase E1 component
DLST	2-oxoglutarate dehydrogenase E2 component (dihydrolipoamide succinyltransferase)
ACO	aconitate hydratase
CS	citrate synthase
DLD	dihydrolipoamide dehydrogenase
fumC	fumarate hydratase, class II
IDH1	isocitrate dehydrogenase
IDH3	isocitrate dehydrogenase (NAD+)
mdh	malate dehydrogenase
MDH1	malate dehydrogenase
MDH2	malate dehydrogenase
pckA	phosphoenolpyruvate carboxykinase (ATP)
PDHA	pyruvate dehydrogenase E1 component alpha subunit
PDHB	pyruvate dehydrogenase E1 component beta subunit
DLAT	pyruvate dehydrogenase E2 component (dihydrolipoamide acetyltransferase)
SDHC	succinate dehydrogenase (ubiquinone) cytochrome b560 subunit
SDHA	succinate dehydrogenase (ubiquinone) flavoprotein subunit
SDHB	succinate dehydrogenase (ubiquinone) iron-sulfur subunit
LSC1	succinyl-CoA synthetase alpha subunit
LSC2	uccinyl-CoA synthetase beta subunit

## Sheet: Phosphatidylinositol signaling 
Differentially expressed genes	K_id desc
CALM	calmodulin
CDIPT	CDP-diacylglycerol--inositol 3-phosphatidyltransferase
CDS1	phosphatidate cytidylyltransferase
DGK	diacylglycerol kinase (ATP)
IMPL2	inositol-phosphate phosphatase / L-galactose 1-phosphate phosphatase / histidinol-phosphatase
INPP5B_F	inositol polyphosphate 5-phosphatase INPP5B/F
PI4KB	phosphatidylinositol 4-kinase B
PIK3C3	phosphatidylinositol 3-kinase
PIP5K	1-phosphatidylinositol-4-phosphate 5-kinase
PLCD	phosphatidylinositol phospholipase C, delta
PPIP5K	inositol-hexakisphosphate/diphosphoinositol-pentakisphosphate 1-kinase
SAC1	phosphatidylinositol 4-phosphatase

## Sheet: MAPK signaling pathway - plant
Differentially expressed genes	K_id desc
ATP7	P-type Cu+ transporter
CHIB	basic endochitinase B
CTR1	serine/threonine-protein kinase CTR1
MAPKKK17_18	mitogen-activated protein kinase kinase kinase 17/18
MKK3	mitogen-activated protein kinase kinase 3
MPK1_2	mitogen-activated protein kinase 1/2
MPK3	mitogen-activated protein kinase 3
MPK4	mitogen-activated protein kinase 4
MPK8	mitogen-activated protein kinase 8
NME	nucleoside-diphosphate kinase
PP2C	protein phosphatase 2C
WRKY33	WRKY transcription factor 33

## Sheet: Peroxisome
Differentially expressed genes	K_id desc
RBOH	respiratory burst oxidase
CAT	catalase
SOD1	superoxide dismutase, Cu-Zn family
SOD2	superoxide dismutase, Fe-Mn family

## Sheet: Glutathione metabolism
Differentially expressed genes	K_id desc
APX1	L-ascorbate peroxidase
CD224	gamma-glutamyltranspeptidase / glutathione hydrolase / leukotriene-C4 hydrolase
DHAR	glutathione dehydrogenase/transferase
DUG1	Cys-Gly metallodipeptidase DUG1
G6PD	glucose-6-phosphate 1-dehydrogenase
GCLC	glutamate--cysteine ligase catalytic subunit
gpx	glutathione peroxidase
GPX1	glutathione peroxidase
gpx1	glutathione peroxidase
GST	glutathione S-transferase
HPGDS	prostaglandin-H2 D-isomerase / glutathione transferase
IDH2	isocitrate dehydrogenase
ODC1	ornithine decarboxylase
OPLAH	5-oxoprolinase (ATP-hydrolysing)
PGD	6-phosphogluconate dehydrogenase
RRM1	ribonucleoside-diphosphate reductase subunit M1
RRM2	ribonucleoside-diphosphate reductase subunit M2
SRM	spermidine synthase
